# Supplementary material for: Fe2O3 nanoparticles coated on ferrocene-encapsulated single-walled carbon nanotubes as stable anode materials for long-term cycling
Source: Royal Society of Chemistry journal article supplement (doi:10.1039/c2ra20071f), 2012-01-01
Supplement: c2ra20071f.pdf [file c2ra20071f.pdf]

## *Electronic Supporting information (ESI)*

### *Fe<sub>2</sub>O<sub>3</sub> nanoparticles coated on ferrocene-encapsulated single-walled carbon nanotubes as stable anode materials for long-term cycles*

*Jiaxin Li, Yi Zhao, Yunhai Ding and Lunhui Guan\**

*State Key Laboratory of Structural Chemistry, Fujian Institute of Research on the*

*Structure of Matter, Chinese Academy of Sciences, YangQiao West Road 155#,*

*Fuzhou, Fujian 350002, P.R. China.*

#### **S1. Raman spectra of the SWCNTs and Fc@SWCNTs**

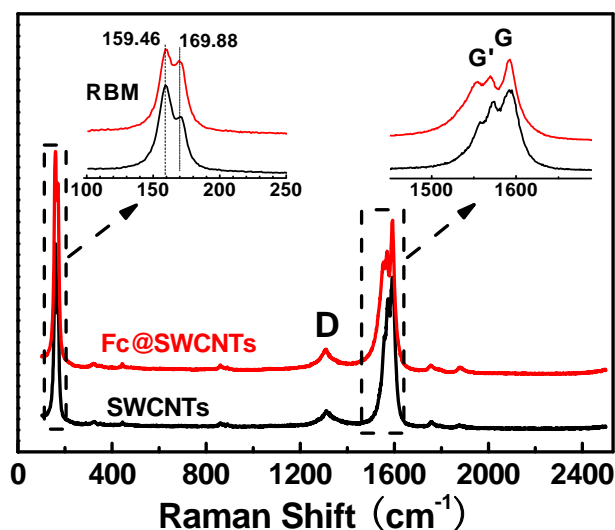

**Fig. S1.** Raman spectra of the SWCNTs and Fc@SWCNTs with the excitation wavelength of 785 nm. The insets show the enlarged RBM and G regions. After doping with Fc, the charge transfer for SWCNT carrier is enhanced obviously, which

result is consistent with the Raman test shown in the following Fig. 2. Both RBM and G bands shifted slightly because of the charge transfer between Fc and host SWCNTs. The G band of the Fc@SWCNTs has a higher intensity, and the shoulder of G band (G' band) is broaden (see the inset in Fig. S1), indicating that the intercalation of Fc molecules into SWCNTs leads to n-doping. These would provide another proof to explain the improvement of conductivity for SWCNT carrier caused by Fc dopant.

## S2. Cycling performance of Fe<sub>2</sub>O<sub>3</sub>/SWCNTs and Fe<sub>2</sub>O<sub>3</sub> NPs

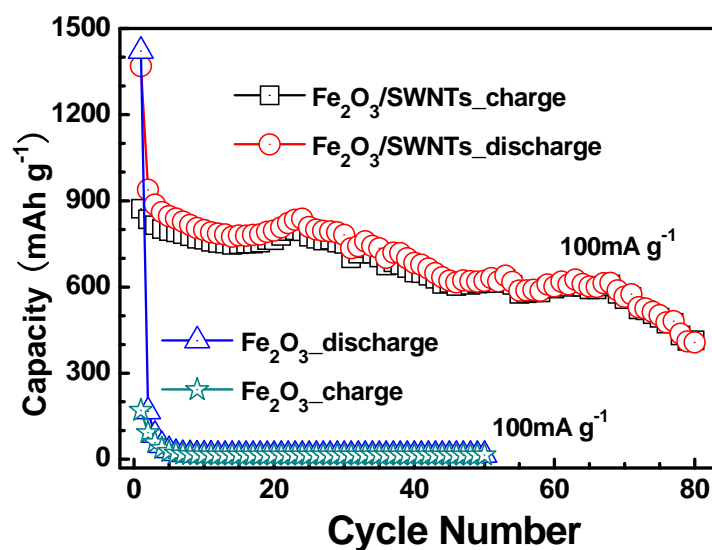

**Fig. S2.** Cycling performance of Fe<sub>2</sub>O<sub>3</sub>/SWCNT and Fe<sub>2</sub>O<sub>3</sub> electrodes as a function of cycle number. Without carrier, Fe<sub>2</sub>O<sub>3</sub> NP electrode sharply deteriorated due to the quick aggregation of NPs and the disconnection of the material. The capacity of Fe<sub>2</sub>O<sub>3</sub> NPs dropped rapidly to 20 mAh g<sup>-1</sup> only after 10 cycles. The capacity for Fe<sub>2</sub>O<sub>3</sub>/SWCNTs (measured at 100 mA g<sup>-1</sup>) was about 400 mAh g<sup>-1</sup> after 80 cycles,

which is notably lower than that of  $\text{Fe}_2\text{O}_3/\text{Fc}@\text{SWCNTs}$  ( $960 \text{ mAhg}^{-1}$ ). The enhanced performance can be surely obtained by filling ferrocene.

### S3. Electrochemical impedance spectra for $\text{Fe}_2\text{O}_3/\text{Fc}@\text{SWCNTs}$

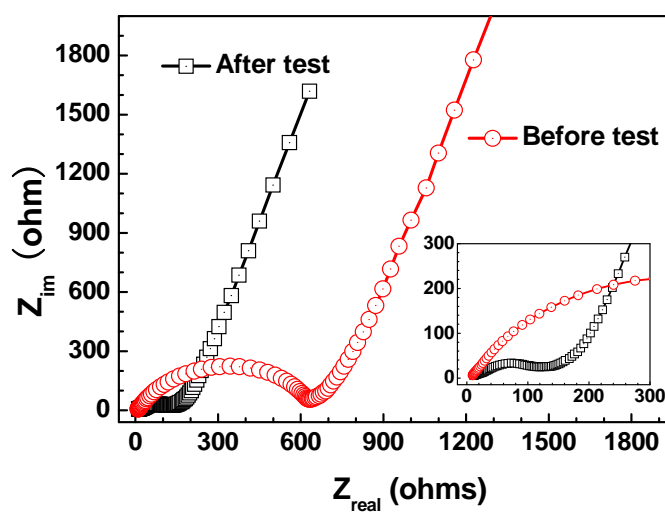

**Fig. S3.** The electrochemical impedance spectra for  $\text{Fe}_2\text{O}_3/\text{Fc}@\text{SWCNT}$  electrode before and after electrochemical test. Conductivity for this electrode remarkably enhanced after test, resulting in the improvement of electrochemical performance.
